# Supplementary material for: Efficient Generation of Somatic Cell Nuclear Transfer-Competent Porcine Cells with Mutated Alleles at Multiple Target Loci by Using CRISPR/Cas9 Combined with Targeted Toxin-Based Selection System
Source: PubMed Central journal article supplement (PMC5751213; doi:10.3390/ijms18122610), 2017-12-04
Supplement: ijms-18-02610-s001.pdf [file ijms-18-02610-s001.pdf]

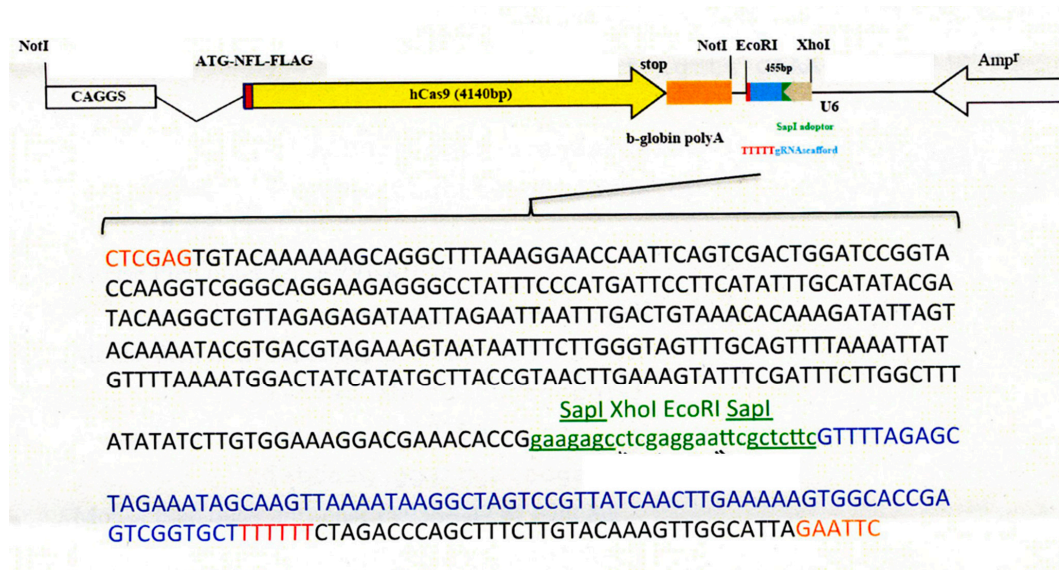

**Supplementary Figure 1.** Structure of pCGsap1.

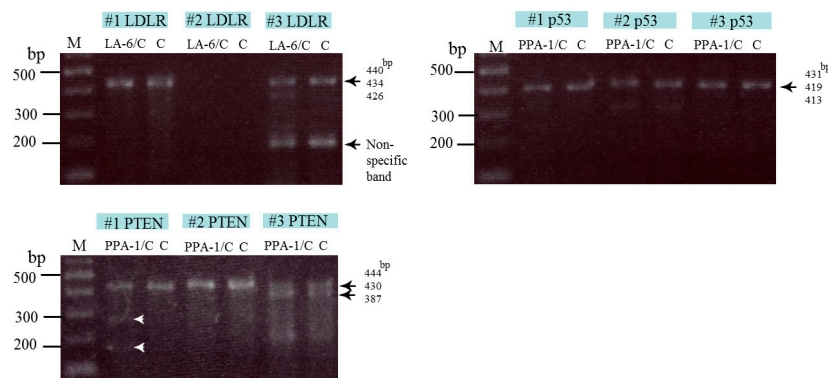

**Supplementary Figure 2.** T7E1 analyses of three potential off-target sites in LA-6 clones (for *LDLR* gene) and PPA-1 clones (for both *p53* and *PTEN* genes), together with untransfected MPEFs. #1 *LDLR*, #2 *LDLR* and #3 *LDLR* are the potential off-target sites for the *LDLR* gene, with the highest scores (Supplementary Table 4). Similarly, #1 *p53*, #2 *p53* and #3 *p53*, and #1 *PTEN*, #2 *PTEN* and #3 *PTEN* are potential off-target sites for the *p53* and *PTEN* genes, respectively (Supplementary Table 4). In each case, an approximately 400 bp long band is predominantly observed when no cleavage occurs. If T7E1-mediated cleavage occurs, two bands (~150 and ~250 bp) are expected to be released from the ~ 400 bp band. Unfortunately, the amplification of the ~ 400 bp products failed when we tried to amplify #2 *LDLR*, in both the LA-6 cells, and the MPEFs. Notably, there is no appreciable off-target cleavage in each of the samples that were amplified successfully, although only the #1 *PTEN* sample exhibited off-target mutations, as evidenced by the presence of two cleaved bands (shown by arrowheads). **M**, 100 bp ladder markers; LA-6/C, a mixture of LA-6 DNA and MPEF DNA; C, MPEF DNA; PPA-1/C, a mixture of PPA-1 DNA and MPEF DNA.

**Supplementary Table 1.** Primers used for PCR-based amplification of target sequences.

| Primer sets         | Sequence (5'-3')                               | Purpose           | Expected size (bp) | Locus        | Reference               |
|---------------------|------------------------------------------------|-------------------|--------------------|--------------|-------------------------|
| Ex4-S<br>Ex4-RV     | GCAAATTAAGGTAGAACGCA<br>GCTGCCCTGAGCCACAACG    | First PCR         | 391                | <i>GGTA1</i> | [19]                    |
| Ex4-2S<br>Ex4-2RV   | CTCCTTAGCGCTCGTTGGCT<br>GCAACTCTCTGGAATGCTTT   | Nested PCR        | 351                | <i>GGTA1</i> | [19]                    |
| E-S                 | AGATATTGGTATAAGCACTTC                          | Direct sequencing | -                  | <i>GGTA1</i> | [43]                    |
| PP-3S<br>PP-3RV     | TCCAGAGGCCCGCCGAGG<br>TACTCCCACGTTATAAGA       | First PCR         | 440                | <i>PTEN</i>  | This study <sup>1</sup> |
| PP-5S<br>PP-OA      | ATTATTCGTCTTCTCCCCATT<br>ATGGATACAGGTCAAGTCTA  | Nested PCR        | 347                | <i>PTEN</i>  | This study <sup>1</sup> |
| PP-6S               | GGGCATCAGCTACCGCCAAGT                          | Direct sequencing | -                  | <i>PTEN</i>  | This study <sup>1</sup> |
| p53-3S<br>p53-3RV   | CTGGCATGTGAAGGGCAG<br>CTACTGGGGTTGGGGGCT       | First PCR         | 317                | <i>p53</i>   | This study <sup>2</sup> |
| p53-4S<br>p53-4RV   | TGCCCCAGCAGCAGAGCC<br>AGCAAGGTTATTAGAAGA       | Nested PCR        | 258                | <i>p53</i>   | This study <sup>2</sup> |
| p53-2S              | TCCCCACAGCGGCCACAC                             | Direct sequencing | -                  | <i>p53</i>   | This study <sup>2</sup> |
| LDLR-S<br>LDLR-RV   | AAACCTCACATTGAAATGCTG<br>CCTAAACTCTCGCGCCCCCT  | First PCR         | 393                | <i>LDLR</i>  | This study <sup>3</sup> |
| LDLR-2S<br>LDLR-2RV | CTGCAAATGACTGGGGCCCCG<br>CTCCAACCACGTAAGAATGAC | Nested PCR        | 355                | <i>LDLR</i>  | This study <sup>3</sup> |
| LDLR-3S             | CGCGCGAAGCCCCGATTTC                            | Direct sequencing | -                  | <i>LDLR</i>  | This study <sup>3</sup> |

<sup>1</sup>Primers are designed based on *Sus scrofa* breed mixed chromosome 14, *Sscrofa* 10.2; NC\_010456.4. <sup>2</sup>Primers are designed based on *Sus scrofa* breed mixed chromosome 12, *Sscrofa* 10.2; NC\_010454.3. <sup>3</sup>Primers are designed based on *Sus scrofa* breed mixed chromosome 2, *Sscrofa* 10.2; NC\_010444.3.

**Supplementary Table 2.** Summary of the *in vitro* development of SCNT embryos derived from PPA-1.

| Treatment with valproic acid (VPA) <sup>1</sup> | No. embryos cultured | No. 2-cell embryos developed (%) | No. blastocysts developed (%) |
|-------------------------------------------------|----------------------|----------------------------------|-------------------------------|
| No                                              | 81                   | 52 (64.2)                        | 21 (25.9)                     |
| Yes                                             | 80                   | 59 (73.8)                        | 25 (31.3)                     |

<sup>1</sup> Treatment of SCNT embryos with 8 mM VPA for 24 h after activation was performed, according to the paper of Miyoshi et al. [45]. Experiments were repeated thrice.

**Supplementary Table 3.** Primer sets used for PCR for off-target analysis.

| Primer sets <sup>1</sup>                       | Sequence (5'-3')                                           | Expected size (bp) | Target sequence                        |
|------------------------------------------------|------------------------------------------------------------|--------------------|----------------------------------------|
| For 1 <sup>st</sup> PCR<br>1LDLR-S<br>1LDLR-RV | TGG AGT GAG GGC GTG TTC TTT<br>CCC AGG AGA CAA GAG TCT CAG |                    | #1 LDLR (see<br>Supplementary Table 4) |
| For nested PCR<br>1LDLR-2S<br>1LDLR-2RV        | CCC ATT AGC AAC TGG GGA GGG<br>GGC TCT GCT CCA GCT GAG CCT | 440                |                                        |
| For 1 <sup>st</sup> PCR<br>2LDLR-S<br>2LDLR-RV | TTT GCT ATT TCT TGG TCT TGG<br>AAC CTG CTG AGC TAT GAG GGA |                    | #2 LDLR (see<br>Supplementary Table 4) |
| For nested PCR<br>2LDLR-2S<br>2LDLR-2RV        | GCC GCT CCC GTG GCA TAT GGA<br>ACT CTG GTC CCT CGT TTT CTT | 426                |                                        |
| For 1 <sup>st</sup> PCR<br>3LDLR-S<br>3LDLR-RV | AAG ATG TAT CTG ACT TCC TTT<br>ACC TGT GGC ATG TGG AAG TTC |                    | #3 LDLR (see<br>Supplementary Table 4) |
| For nested PCR<br>3LDLR-2S<br>3LDLR-2RV        | GGG ATT TAC TTA TAC TCT AAA<br>CCA TCC CAG GGA TCA AAC CCA | 434                |                                        |
| For 1 <sup>st</sup> PCR<br>1P53-S<br>1P53-RV   | GAG CCA TGA TGG GAA CTC CAG<br>TTT ATT GCT TGA GTG TTT CTC |                    | #1 p53 (see Supplementary<br>Table 4)  |
| For nested PCR<br>1P53-2S<br>1P53-2RV          | TTT GCT CTT TGT TGA GTG AAT<br>GCG ATA ACA GCC ATC GGG GAG | 419                |                                        |
| For 1 <sup>st</sup> PCR<br>2P53-S<br>2P53-RV   | GTG CTG GAA TGT CAT CTC CTG<br>GGG CCA GTA AGT GTT CTC TGA |                    | #2 p53 (see Supplementary<br>Table 4)  |
| For nested PCR<br>2P53-2S<br>2P53-2RV          | TTG CTT CGC TTG GTT AAA TCC<br>CTG GCC GCT TGA TGC CCG CCA | 431                |                                        |
| For 1 <sup>st</sup> PCR<br>3P53-S<br>3P53-RV   | TTT ATT AAC CAC GTC TCT GTG<br>AGC TCC CGG TTC TCT GTG GTC |                    | #3 p53 (see Supplementary<br>Table 4)  |
| For nested PCR<br>3P53-2S<br>3P53-2RV          | CTG TAG CTC CGT GCC ATG CTG<br>ATT TTC CGA GGC CGC AGC CCT | 413                |                                        |
| For 1 <sup>st</sup> PCR<br>1PT-S<br>1PT-RV     | CTT GGC TGC AAA ACG CTG CAC<br>TTG GCC AGA TGC CCA TCT CTC |                    | #1 PTEN (see<br>Supplementary Table 4) |
| For nested PCR<br>1PT-2S<br>1PT-2RV            | AGG GCA CAT GCT ACA CAT TGT<br>TAG AAT CTG TTA ACT TGC TGA | 430                |                                        |
| For 1 <sup>st</sup> PCR<br>2PT-S<br>2PT-RV     | GTA CGC TAG GAA AGT GGT GCT<br>AAA CCT GTG GTT ATA AGA AAC |                    | #2 PTEN (see<br>Supplementary Table 4) |
| For nested PCR<br>2PT-2S<br>2PT-2RV            | AGT GGT GCT CCT CAG AAA TCC<br>AGA AAC TCA CTT ATA CCA GTT | 444                |                                        |
| For 1 <sup>st</sup> PCR<br>3PT-S<br>3PT-RV     | TTA ACT ATC TGT GCC ACA GGG<br>TTT CAA CTC AAA GGA CAA TTA |                    | #3 PTEN (see<br>Supplementary Table 4) |
| For nested PCR<br>3PT-2S<br>3PT-2RV            | TTA AAG ATG TCT CAG TAG AGC<br>CAA TTG GGT GAG TCA AAC AAA | 387                |                                        |

<sup>1</sup> PCR was performed twice (1<sup>st</sup> and nested PCR) to obtain PCR products which will be subjected to a T7E1 assay.

**Supplementary Table 4.** List of candidate genes that potentially cause off-target mutations.

| Target sequence                               | Score | Mismatches   | Locus           |
|-----------------------------------------------|-------|--------------|-----------------|
| #1 LDLR: GGAAGGAGGCATGAAGTCCATGG <sup>1</sup> | 2.4   | 3MMs [3:4:8] | chr13:-77692404 |
| #2 LDLR: AGCTGGAAGCATGGAGTCCAAAG <sup>2</sup> | 1.6   | 2MMs [1:14]  | chr5:-9433584   |
| #3 LDLR: GTCTGTAGGCATGAAGTCCAGAG <sup>3</sup> | 1.5   | 3MMs [2:6:8] | chr5:-51618960  |

<sup>1</sup>The gRNA (GGCTGGAAGCATGAAGTCCA) for *LDLR* used here exhibits similarity to *Sus scrofa* chromosome 13 clone CH242-223L17, WORKING DRAFT SEQUENCE, 4 unordered pieces Sequence ID: [CU633560.2](#), as shown below.

```

Query 1      GGAAGGAGGCATGAAGTCCATGG  23
           |||
Sbjct 182529 GGAAGGAGGCATGAAGTCCATGG  182551

```

<sup>2</sup>The gRNA (GGCTGGAAGCATGAAGTCCA) for *LDLR* used here also exhibits similarity to *Sus scrofa* chromosome 5 clone CH242-222P18, WORKING DRAFT SEQUENCE, 5 unordered pieces Sequence ID: [CU457758.3](#), as shown below.

```

Query 1      AGCTGGAAGCATGGAGTCCAAAG  23
           |||
Sbjct 131570 AGCTGGAAGCATGGAGTCCAAAG  131548

```

<sup>3</sup>The gRNA (GGCTGGAAGCATGAAGTCCA) for *LDLR* used here also exhibits similarity to *Sus scrofa* chromosome 5 clone CH242-507E14, WORKING DRAFT SEQUENCE, 9 unordered pieces Sequence ID: [CU582865.2](#), as shown below.

```

Query 1      GTCTGTAGGCATGAAGTCCAGAG  23
           |||
Sbjct 93430  GTCTGTAGGCATGAAGTCCAGAG  93452

```

| Target sequence                              | Score | Mismatches     | Locus           |
|----------------------------------------------|-------|----------------|-----------------|
| #1 p53: GGAGGAATCGCAGTCCCAGCGGG <sup>1</sup> | 2.3   | 2MMs [7:17]    | chr1:-9154440   |
| #2 p53: GGAGGAGGCACAGTCCGAGGCAG <sup>2</sup> | 1.1   | 3MMs [8:10:20] | chr10:+54637828 |
| #3 p53: GGAAAAGTCGATTCCGAGCAGG <sup>3</sup>  | 1.1   | 3MMs [4:5:13]  | chr6:-4664593   |

<sup>1</sup>The gRNA (GGAGGAGTCGCAGTCCGAGC) for *p53* used here exhibits similarity to *Sus scrofa* chromosome 1 clone CH242-205C17, WORKING DRAFT SEQUENCE, 7 unordered pieces Sequence ID: [FP017297.2](#), as shown below.

```

Query 1      GGAGGAATCGCAGTCCCAGCGGG  23
           |||
Sbjct 48297  GGAGGAATCGCAGTCCCAGCGGG  48275

```

<sup>2</sup>The gRNA (GGAGGAGTCGCAGTCCGAGC) for *p53* used here also exhibits similarity to *Sus scrofa* chromosome 10 clone CH242-56F1, WORKING DRAFT SEQUENCE, 4 unordered pieces Sequence ID: [CU929835.2](#), as shown below.

```

Query 1      GGAGGAGGCACAGTCCGAGGCAG  23
           |||

```

Sbjct 129076 GGAGGAGGCACAGTCCGAGGCAG 129098

<sup>3</sup>The gRNA(GGAGGAGTCCGAGTCCGAGC) for *p53* used here also exhibits similarity to *Sus scrofa* chromosome 6 clone CH242-270I23, WORKING DRAFT SEQUENCE, 2 unordered pieces Sequence ID: [CU929750.2](#), as shown below.

```
Query 1      GGAAAAGTCGCATTCCGAGCAGG 23
              |||
Sbjct 102779 GGAAAAGTCGCATTCCGAGCAGG 102801
```

| Target sequence                               | Score | Mismatches   | Locus            |
|-----------------------------------------------|-------|--------------|------------------|
| #1 PTEN: AGAACTTTAGCAGAAACAAAGGG <sup>1</sup> | 3.3   | 2MMs [4:6]   | chr14:-30783590  |
| #2 PTEN: AGATAGCAAGCAGAAACAAAGAG <sup>2</sup> | 1.6   | 3MMs [5:7:8] | chr11:+42428743  |
| #3 PTEN: AGAAAATTAGCAGAAACAAAAAG <sup>3</sup> | 1.5   | 3MMs [4:5:6] | chr13:-104741013 |

<sup>1</sup>The gRNA (AGATCGTTAGCAGAAACAAA) for *PTEN* used here exhibits similarity to *Sus scrofa* chromosome 14 clone CH242-254G23, WORKING DRAFT SEQUENCE, 3 unordered pieces Sequence ID: [CU638677.2](#), as shown below.

```
Query 1      AGAACTTTAGCAGAAACAAAGGG 23
              |||
Sbjct 63363  AGAACTTTAGCAGAAACAAAGGG 63341
```

<sup>2</sup>The gRNA (AGATCGTTAGCAGAAACAAA) for *PTEN* used here also exhibits similarity to *Sus scrofa* chromosome 11 clone CH242-486J15, WORKING DRAFT SEQUENCE, 18 unordered pieces Sequence ID: [CU861566.2](#), as shown below.

```
Query 1      AGATAGCAAGCAGAAACAAAGAG 23
              |||
Sbjct 104067 AGATAGCAAGCAGAAACAAAGAG 104045
```

<sup>3</sup>The gRNA (AGATCGTTAGCAGAAACAAA) for *PTEN* used here also exhibits similarity to *Sus scrofa* chromosome 13 clone CH242-13B18, WORKING DRAFT SEQUENCE, 2 unordered pieces Sequence ID: [FP236261.2](#), as shown below.

```
Query 1      AGAAAATTAGCAGAAACAAAAAG 23
              |||
Sbjct 89317  AGAAAATTAGCAGAAACAAAAAG 89339
```
